# Supplementary material for: Analysis of Animal Well-Being When Supplementing Drinking Water with Tramadol or Metamizole during Chronic Pancreatitis
Source: Animals (Basel). 2020 Dec 5;10(12):2306. doi: 10.3390/ani10122306 (PMC7762076; doi:10.3390/ani10122306)
Supplement: Supplementary file 1 [file animals-10-02306-s001.zip › Supplementary File 2-raw data-2020-12-3.xlsx]

## Sheet: Fig2ABurrowing
Days	Burrowed [g] (metamizol no sucrose)									Burrowed [g] (tramadol no sucrose)
-21	151	111	139	164	162	200	200			136	166	56	150	79	189	124
-20	185	48	145	149	155	198	181			195	127	103	155	99	200	184
-19	117	79	171	162	146	166	197			171	119	47	90	67	115	177
-18	200	112	84	115	133	146	200			150	117	74	95	121	149	166
-17	111	48	78	126	148	172	176			151	108	103	111	133	154	166
Days	Burrowed [g] (metamizol + sucrose)									Burrowed [g] (tramadol + sucrose)
-14	97	51	67	120	156	104	200			194	130	137	98	126	133	149
-13	89	45	84	200	143	171	200			200	163	200	150	187	144	166
-12	200	60	94	136	200	158	200			195	99	152	156	145	117	116
-11	121	92	181	118	196	161	200			200	104	142	123	192	142	143
-10	160	63	45	115	200	149	200			189	137	72	200	200	173	200

## Sheet: Fig2BNesting (2)
Days	Nesting score (metamizol no sucrose)									Nesting score (tramadol no sucrose)
-21	5	4	6	4	5	5	5			5	6	5	4	4	5	5
-20	4	4	5	4	4	5	6			5	6	6	4	5	5	5
-19	5	5	6	5	5	6	6			5	1	5	3	4	5	3
-18	4	5	5	5	4	5	6			5	6	6	6	4	6	4
-17	6	4	4	5	6	5	6			4	5	6	6	4	6	5
Days	Nesting score (metamizol + sucrose)									Nesting score (tramadol + sucrose)
-14	5	4	5	3	4	5	6			5	5	5	4	4	5	4
-13	4	5	4	4	5	4	6			6	5	5	4	5	4	5
-12	1	5	5	3	4	2	5			5	4	5	4	4	5	3
-11	4	4	6	2	3	3	5			5	6	5	5	4	5	2
-10	5	5	4	4	4	4	6			5	4	6	5	5	6	6

## Sheet: Fig2CBodyWeight
Days	body weight [g] (metamizol no sucrose)									body weight [g] (tramadol no sucrose)
-21	23.46	24.84	22.65	26.44	24.78	24.26	22.55			22.72	23.85	22.74	23.94	23.8	24.9	24.73
-20	23.45	24.85	22.63	26.16	24.4	24.13	22.57			22.9	23.36	22.43	24.05	24.14	24.79	24.81
-19	23.42	24.51	22.53	25.95	24.14	23.99	22.34			22.42	23.05	22.98	24.02	23.82	24.52	24.42
-18	23.33	24.92	22.83	25.83	24.58	24.01	22.14			22.7	23.28	22.63	23.85	23.51	24.9	24.45
-17	23.4	24.97	22.77	25.85	24.78	23.68	21.63			22.84	23.12	22.91	23.94	24.06	24.83	24.27
Days	body weight [g] (metamizol + sucrose)									body weight [g] (tramadol + sucrose)
-14	24.1	24.5	23.59	26.37	25.27	24.78	23.54			23.7	23.96	22.74	24.96	23.54	25.25	24.9
-13	24.1	24.63	23.27	26.27	25.16	24.41	23.52			23.72	23.98	22.94	24.9	24.22	25.33	24.96
-12	24.03	24.91	23.05	26.54	25.11	24.37	22.63			23.63	23.83	23.19	24.63	24.04	25.45	24.78
-11	24.12	24.69	23.4	26.51	24.77	23.6	22.67			23.55	23.9	23.29	24.73	24.37	25.3	24.69
-10	24.39	25.24	23.43	26.44	24.61	23.7	23.1			23.95	24.3	23.6	24.87	24.13	25.62	24.44

## Sheet: Fig3+Suppl. File 1
Days	Water consumption [ml/g] (metamizol no sucrose)									Water consumption [ml/g] (tramadol no sucrose)
-21	0.231	0.241	0.273		0.576	0.332	0.259			0.319	0.225	0.274	0.26	0.25	0.326	0.262
-20	0.243	0.238	0.247		0.093	0.334	0.293			0.326	0.193	0.259	0.246	0.303	0.333	0.279
-19	0.213	0.217	0.23		0.291	0.232	0.23			0.271	0.253	0.352	0.266	0.298	0.367	0.314
-18	0.303	0.306	0.422	0.347	0.418	0.438	0.443			0.312	0.39	0.444	0.229	0.437	0.473	0.41
-17	0.459	0.197	0.28	0.174	0.448	0.283	0.429			0.22	0.198	0.221	0.235	0.285	0.394	0.249
Days	Water consumption [ml/g] (metamizol + sucrose)									Water consumption [ml/g] (tramadol + sucrose)
-14	0.247	0.194	0.229	0.255	0.266	0.311	0.217			0.293	0.264	0.224	0.261	0.222	0.229	0.23
-13	0.299	0.224	0.225	0.231	0.253	0.282	0.195			0.232	0.271	0.299	0.276	0.221	0.238	0.269
-12	0.32	0.252	0.271	0.301		0.307	0.174			0.291	0.342	0.323	0.297	0.318	0.312	0.304
-11	0.229	0.169	0.174	0.177	0.227	0.197	0.163			0.275	0.302	0.267	0.284	0.254	0.267	0.27
-10	0.224	0.186	0.171	0.192	0.234	0.199	0.163			0.229	0.297	0.271	0.275	0.25	0.249	0.239

## Sheet: Fig4
Pancreas to body weight ratio
healthy mice	chronic pancreatitis + metamizol	chronic pancreatitis + tramadol
0.009	0.00461083	0.00506329
0.008	0.00603376	0.00529363
0.006	0.00482906	0.00477861
0.008	0.00427607	0.00522876
0.009	0.00488613	0.00547711
0.009	0.00421053	0.00576216
0.007	0.00433839	0.00555556
0.006
0.008
0.009
0.011
0.012
												Fig4n

## Sheet: Fig5
Days	Distress score (metamizol no sucrose)									Distress score (tramadol no sucrose)
-3	0	0	0	0	0	0	0			0	0	0	0	0	0	0
2	0	2	2	0	0	2	2			2	0	2	2	2	0	0
16	0	0	0	0	0	0	0			0	0	0	0	0	0	0
30	0	0	0	0	0	0	0			0	0	0	0	0	0	0
Days	Burrowing [%] (metamizol no sucrose)									Burrowing [%] (tramadol no sucrose)
-4	114.3	156.7	47	77.1	81.5	117.5	75.5			67.9	55.7	124.3	70.5	71	125.2	88.6
2	30.9	16.4	15.5	25.5	33.5	51.1	43.5			0	28.7	0	9.8	38.5	38.7	5.7
16	73.1	113.4	56	84.9	77	78.8	97			14.2	100	32.4	17.2	87.5	81.5	116.3
30	24	23.9	13.5	65.6	68.5	90.5	94.5			0.6	70.4	18.9	2.5	1.5	121	24.4
Days	Nesting score (metamizol no sucrose)									Nesting score (tramadol no sucrose)
-4	5	5	5	4	3	4	6			6	4	5	5	5	2	5
2	5	6	5	6	5	5	5			6	5	5	6	5	6	6
16	1	6	5	5	5	4	6			6	5	6	6	4	6	5
30	5	4	4	3	5	4	5			5	4	6	5	5	5	5
Days	Fecal metabolite concentration [ng/g] (metamizol no sucrose)
-4	617	636	982	572	614	240	593
2	1805	714	1988	1508	517	285	828
16	982	801	499	718	1194	749	701
30	767	345	1032	572	464	305	604
Days	Body weight [%] (metamizol no sucrose)									Body weight [%] (tramadol no sucrose)
-4	101.25	100.31	100.46	100.66	98.82	98.64	100.29			99.0079	99.6723	99.697	100.521	101.758	100.976	99.1597
2	99.03	99.49	98.33	97.16	98.16	96.98	96.12			96.7755	98.2384	98.7013	103.809	100.613	98.5558	99.92
16	95.2362	96.423	96.6151	94.1307	97.4902	96.6515	96.588			96.7755	99.0168	98.7446	98.4763	97.5879	96.4481	97.8391
30	95.438	92.1462	97.7852	98.4127	94.7059	98.1811	97.0935			97.9744	99.0578	98.7446	98.1556	95.5437	95.5113	95.7983

## Sheet: Fig6
Days	Water consumption [ml/g] (metamizol no sucrose)									Water consumption [ml/g] (tramadol no sucrose)
-4	0.311	0.26	0.226	0.258	0.22	0.256	0.215			0.356	0.389	0.437	0.501	0.135	0.32	0.3
2	0.234	0.196	0.2	0.198	0.182	0.191	0.154			0.269	0.353	0.231	0.282	0.227	0.231	0.228
16	0.383	0.268	0.237	0.273	0.294	0.268	0.266			0.377	0.544	0.382	0.382	0.299	0.429	0.293
30	0.431	0.21	0.343	0.311	0.403	0.385	0.338			0.289	0.39	0.297	0.318	0.266	0.333	0.268
